# Supplementary material for: Hydrodechlorination under O2 promotes catalytic oxidation of CVOCs over a Pt/TiO2 catalyst at low temperature
Source: Royal Society of Chemistry journal article supplement (doi:10.1039/d4cc06366j), 2025-01-01
Supplement: d4cc06366j1.pdf [file d4cc06366j1.pdf]

## Supporting Information

### **Hydrodechlorination under O<sub>2</sub> Promote Catalytic Oxidation of CVOCs over Pt/TiO<sub>2</sub> Catalyst at Low-temperature**

Yonghua Zhao<sup>a</sup>, Yanke Yu<sup>a,\*</sup>, Jiahang Li<sup>a</sup>, Jinmin Xie<sup>a</sup>, Chi He<sup>a,b,\*</sup>

<sup>a</sup> *State Key Laboratory of Multiphase Flow in Power Engineering, Xi'an Jiaotong University, Xi'an 710049, Shaanxi, P.R. China*

<sup>b</sup> *National Engineering Laboratory for VOCs Pollution Control Material & Technology, University of Chinese Academy of Sciences, Beijing 101408, P.R. China*

\*To whom correspondence should be addressed:

E-mail: yankeyu@xjtu.edu.cn (Y. Yu), chi\_he@xjtu.edu.cn (C. He)

**Summary: 18 Pages, 1 Table, and 12 Figures**

## MATERIAL AND METHODS

### Catalyst Preparation

Pt/TiO<sub>2</sub> catalyst with Pt content of 0.5 wt.% was prepared by a wet impregnation method. Typically, 100 mL solution with H<sub>2</sub>PtCl<sub>6</sub> concentration of 10 g·L<sup>-1</sup> was firstly prepared. 4.2 mL H<sub>2</sub>PtCl<sub>6</sub> solution was added into 30 mL ultrapure water, then 4.0 g TiO<sub>2</sub> (Anatase, T299213-500g, Aladdin) was added into the solution. The solution was dried at 80 °C under magnetic stirring. After that, the obtained sample was calcined at 450 °C for 3 h in a muffle furnace and then calcined in the presence of 5.0% H<sub>2</sub>/Ar at 450 °C for another 3 h.

### Activity Measurement

Activity of Pt/TiO<sub>2</sub> catalyst in the oxidation of vinyl chloride was measured in a fixed-bed reactor with a quartz tube of inner diameter as 8 mm. In order to avoid the thermal effect, 0.8 g catalyst (40-60 mesh) was mixed with 0.8 g quartz sand (40-60 mesh). The mixed gas (800 mL/min) contained 500 ppm vinyl chloride, 20% O<sub>2</sub>, 1000 ppm H<sub>2</sub> (when used), and balanced with N<sub>2</sub> (space velocity of 60,000 mL·g<sup>-1</sup>·h<sup>-1</sup>). An IGS FT-IR analyzer (Thermo Scientific, USA) was used to detect the concentration of vinyl chloride, HCl, and CO<sub>2</sub> in the mixed gas. The conversion of vinyl chloride ( $x_{VC}$ ), yield of CO<sub>2</sub> ( $Y_{CO_2}$ ) and HCl ( $Y_{HCl}$ ) were calculated by the following equations.

$$x_{VC} = \frac{C_{VC,in} - C_{VC,out}}{C_{VC,in}}$$
$$Y_{HCl} = \frac{C_{HCl}}{C_{VC,in}}$$
$$Y_{CO_2} = \frac{C_{CO_2}}{C_{VC,in} \times 2}$$

where  $C_{VC,in}$  is the concentration of vinyl chloride in the inlet the reactor;  $C_{VC,out}$ ,  $C_{HCl}$  and

$C_{CO_2}$  are the concentration of vinyl chloride, HCl and  $CO_2$  in the outlet of the reactor.

The turnover frequency (TOF) of the catalyst at 225 °C was calculated by the following formula:

$$TOF = \eta_{VC} F_{VC} \frac{M_{Pt}}{m_{cat} X_{Pt} D_{Pt}}$$

Where  $\eta_{VC}$  was VC conversion (%) at 225 °C,  $F_{VC}$  was the VC flow rate ( $mol \cdot s^{-1}$ ),  $m_{cat}$  was the weight of catalyst (g),  $M_{Pt}$  was the relative atomic mass of Pt ( $g \cdot mol^{-1}$ ),  $X_{Pt}$  was the Pt mass fraction in the catalyst (%) and  $D_{Pt}$  was the dispersion of Pt on the catalyst (%).

### Characterizations

$N_2$  adsorption-desorption isotherm was recorded at -196 °C on a NOVA 2000e surface area and pore size analyzer (Quantachrome, USA) and the specific surface area of the catalyst was calculated by Brunauer-Emmett-Teller (BET) method. XRD was collected on an X'Pert Pro XRD diffractometer (Panalytical, Netherlands) with Cu  $K\alpha$  radiation. XPS was measured on an ESCALAB 250 spectrometer with Al  $K\alpha$  radiation (ThermoFisher, USA). Raman spectroscopy was recorded on a Renishaw inVia Qontor Raman spectrometer (Renishaw, UK) at 532 nm.

Temperature-programmed surface reaction-Mass spectrum (TPSR-MS) was carried out on a Quantachrome ChemBET-3000 TPR-TPD chemisorption analyzer (Quantachrome, USA) with an online MS (OmniStar GSD 320, Pfeiffer, Germany) as detector. 0.05 g catalyst was pretreated under 10.0%  $H_2/Ar$  at 400 °C for 1 h and then the temperature was cooled to room temperature. After that, mixed gas was inlet for 30 min and the temperature increased to 400 °C with 10 °C/min.

Deuterium gas ( $D_2$ , 99.999%, SUZHOU CHANGYOU GAS, China) was used in isotope experiment.

*In situ* Diffuse Reflectance Infrared Fourier Transform Spectroscopy (DRIFTS) were performed on a Tensor 37 FTIR (Bruker, German) with a mercury-cadmium-telluride (MCT) detector. The sample was pretreated under  $N_2$  at 400 °C for 1 h. Then the temperature was cooled to 150 or 250 °C for 15 min and the background spectra were recorded at corresponding temperature. Finally, switching to the target gas and then the spectrum was recorded at 100 scans,  $4\text{ cm}^{-1}$ .

### **DFT Calculations**

Density functional theory (DFT) calculations within the generalized gradient approximation (GGA) using the Perdew-Burke-Ernzerhof (PBE) functional were performed on Vienna Ab initio Simulation Package (VASP). Projected augmented wave (PAW) potentials was chosen to describe the ionic cores and take valence electrons into account using a plane wave basis set with a kinetic energy cutoff of 400 eV. The DFT-D3 empirical correction method was employed to describe van der Waals interactions. Geometry optimizations were performed with the force convergency smaller than 0.05 eV/Å. Gamma Scheme k-points of  $1 \times 1 \times 1$  was applied for all the calculations. The atoms at bottom were fixed in all the calculations. DFT + U approach was introduced to Ti treat the highly localized 3d states, using parameters of  $U-J = 4.0\text{ eV}$ . Spin-polarization effect was also considered. A model of Pt-cluster with 4 Pt atoms supported on anatase (101) was built.<sup>1,2</sup>

1. F. Long, X. Cao, P. Liu, X. Jiang, J. Jiang, X. Zhang, J. Xu. Journal of Cleaner Production, 2022,

375, 133975.

2. D. Wang, Z.-P. Liu, W.-M. Yang. *ACS Catalysis*, 2018, 8, 7270-7278.

## Supplementary Table

**Table S1** Activity of reported typical catalysts for vinyl chloride oxidation.

| Catalyst                                              | Space velocity<br>(mL·g <sup>-1</sup> ·h <sup>-1</sup> ) | Conversion temperature*<br>(°C) | Refs.     |
|-------------------------------------------------------|----------------------------------------------------------|---------------------------------|-----------|
| Ru-Ce <sub>0.5</sub> Zr <sub>0.5</sub> O <sub>2</sub> | 60,000                                                   | $T_{90} = 262, T_{50} = 220$    | S1        |
| Ru/Co <sub>3</sub> O <sub>4</sub>                     | 50,000                                                   | $T_{90} = 278, T_{50} = 250$    | S2        |
| Ru/Sn-MFI                                             | 30,000                                                   | $T_{90} = 306, T_{50} = 264$    | S3        |
| Pt/WO <sub>3</sub> -CeO <sub>2</sub>                  | 15,000                                                   | $T_{90} = 254, T_{50} = 210$    | S4        |
| Pt/CeO <sub>2</sub>                                   | 15,000                                                   | $T_{90} = 280, T_{50} = 230$    | S5        |
| Pt/Al <sub>2</sub> O <sub>3</sub>                     | 80,000                                                   | $T_{90} = 307, T_{50} = 231$    | S6        |
| Pt/Al <sub>2</sub> O <sub>3</sub>                     | 80,000                                                   | $T_{90} = 307, T_{50} = 231$    | S6        |
| Pt/TiO <sub>2</sub>                                   | 60,000                                                   | $T_{90} = 309, T_{50} = 268$    | This work |
| Pt/TiO <sub>2</sub> (1000 ppm H <sub>2</sub> )        | 60,000                                                   | $T_{90} = 198, T_{50} = 164$    | This work |

\* $T_{50}$  and  $T_{90}$  represented temperatures corresponding to the toluene conversion of 50% and 90%.

## REFERENCES

- S1. B.C. Xie, Z.J. Wei, M. Ding, M.X.Z. Gao, L. Wang, W.C. Zhan, Q.G. Dai, Y. Guo, A.Y. Wang, and Y.L. Guo, *Appl. Catal. B Environ.*, 2024, 350, 392-402.
- S2. H. Liu, J. Yang, Y.Y. Jia, Z.Q. Wang, M.X. Jiang, K. Shen, H.L. Zhao, Y.L. Guo, Y. Guo, L. Wang, S. Dai and W.C. Zhan, *Environ. Sci. Technol.*, 2021, 40, 817-827.
- S3. M.Q. Li, Y.A. Cai, W.C. Zhan, L. Wang, Q.G. Dai, Y. Guo, A.Y. Wang and Y.L. Guo, *Sep. Purif. Technol.*, 2024, 340, 126773.
- S4. Qifeng Zhang, Zhengbo Zhou, Tian Fang, Han Gu, Yanglong Guo, Wangcheng Zhan, Yun Guo,

Li Wang. *Journal of Rare Earths* 40 (2022) 1462-1470.

S5. Qifeng Zhang, Jiyuan Liu, Chen Wang, Yanglong Guo, Wangcheng Zhan, Li Wang, Xueqing Gong, Yun Guo. *Chemosphere*, 2022, 307, 135861.

S6. Min-Hao Yuan, Chia-Chi Chang, Ching-Yuan Chang, Wei-Chu Liao, Je-Lueng Shie, Yi-Hung Chen, Dar-Ren Ji & Chao-Hsiung Wu. *Journal of Environmental Science and Health, Part A* 2015, 50, 1187-1193.

## Supplementary Figures

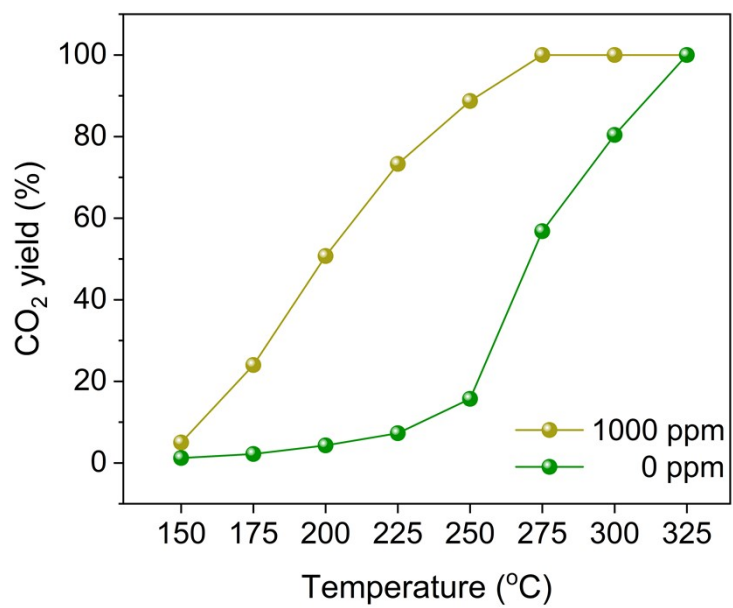

**Figure S1.** CO<sub>2</sub> yield on Pt/TiO<sub>2</sub> catalyst in the absence and presence of H<sub>2</sub>.



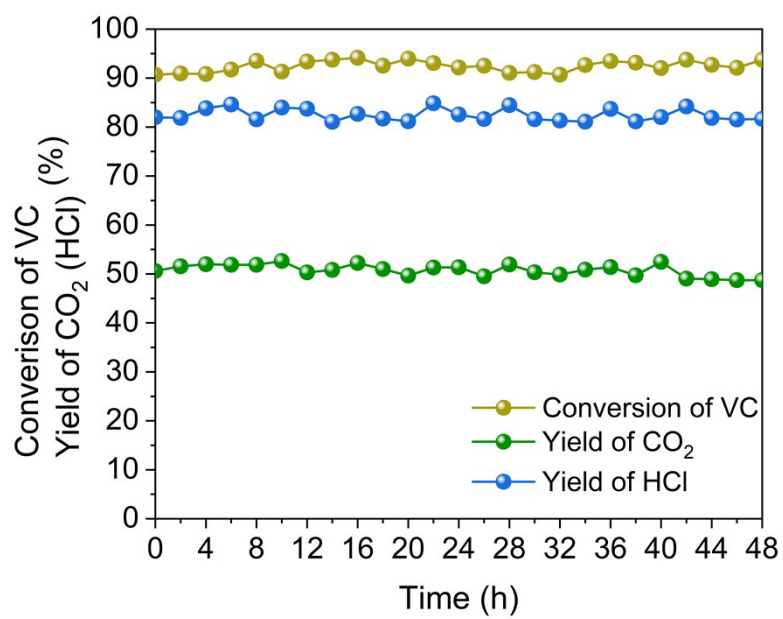

**Figure S2.** Stability of Pt/TiO<sub>2</sub> catalyst in oxidation of VC with H<sub>2</sub>.

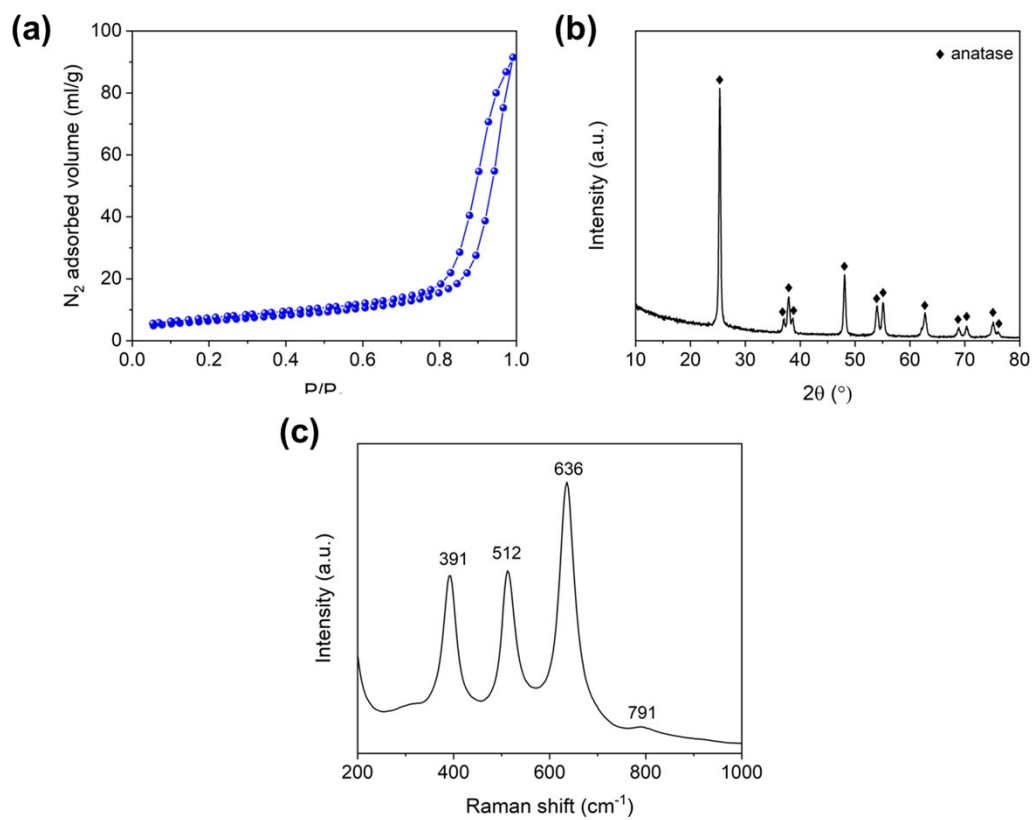

**Figure S3.** (a)  $N_2$  adsorption-desorption isotherm, (b) XRD and (c) Raman result of the catalyst.

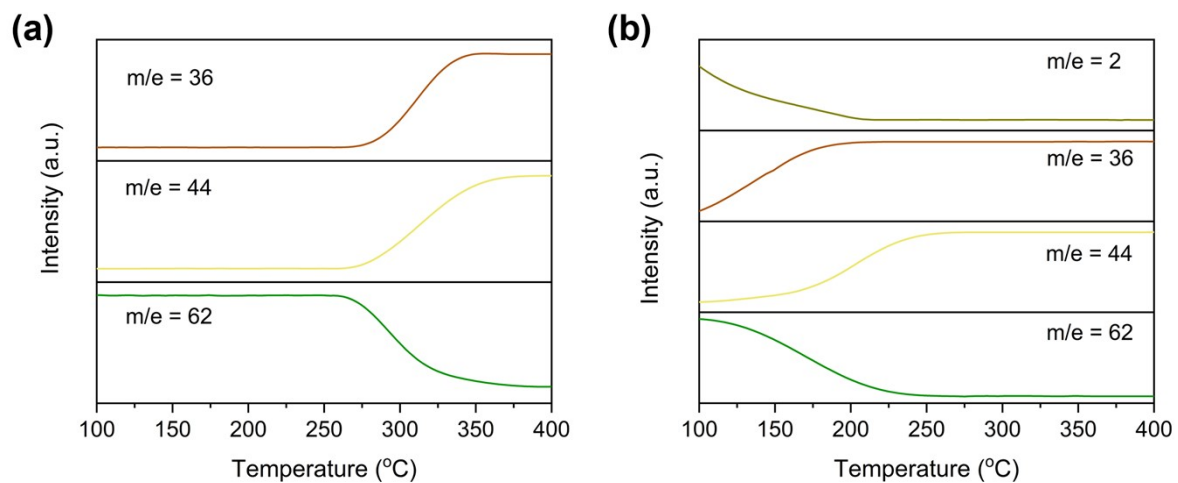

**Figure S4.** TPSR-MS result of (a) O<sub>2</sub> + VC and (b) O<sub>2</sub>+VC+H<sub>2</sub> over Pt/TiO<sub>2</sub> catalyst.

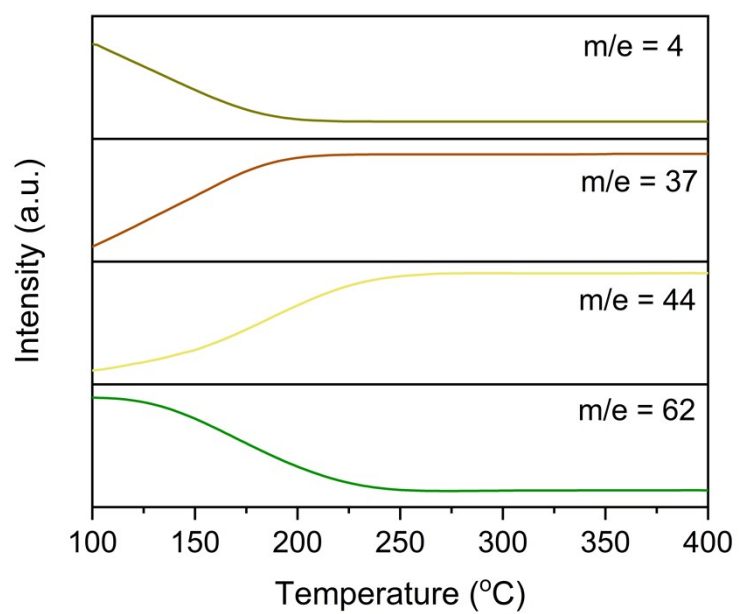

**Figure S5.** TPSR-MS result of  $O_2+VC+D_2$  over Pt/TiO<sub>2</sub> catalyst.

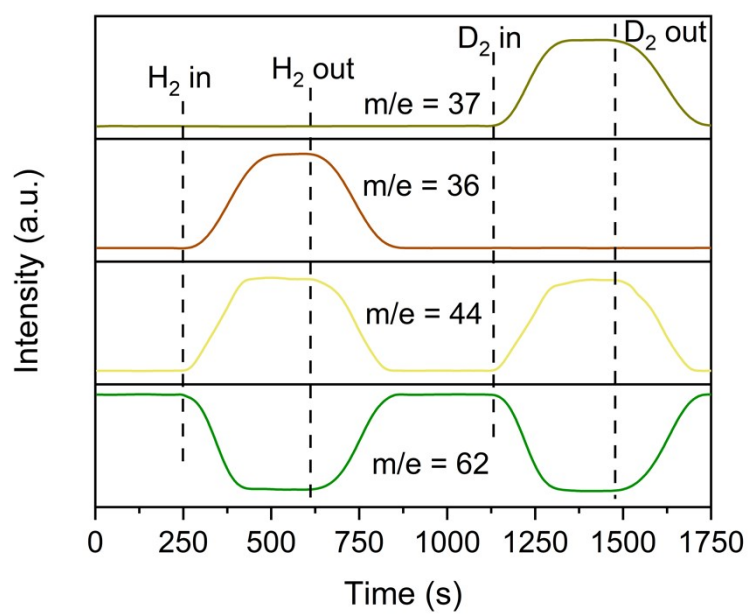

**Figure S6.** The effect of H<sub>2</sub> and D<sub>2</sub> on the oxidation of VC over Pt/TiO<sub>2</sub> catalyst.

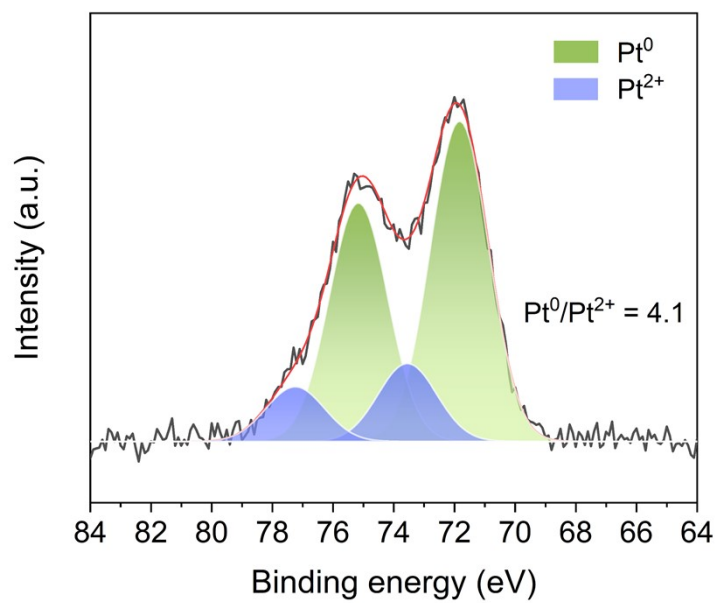

**Figure S7.** XPS result of Pt 4f of Pt/TiO<sub>2</sub> catalyst.

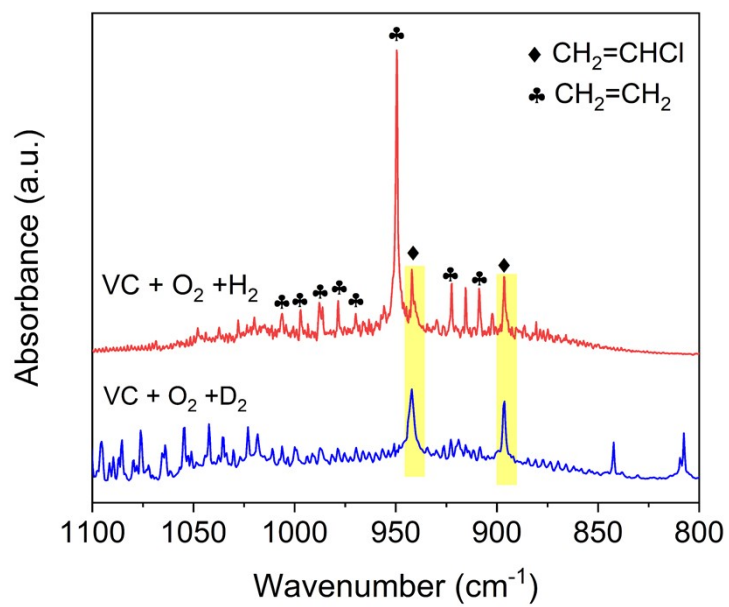

**Figure S8.** FT-IR spectra of mixture gas from reactor outlet at 200 °C.

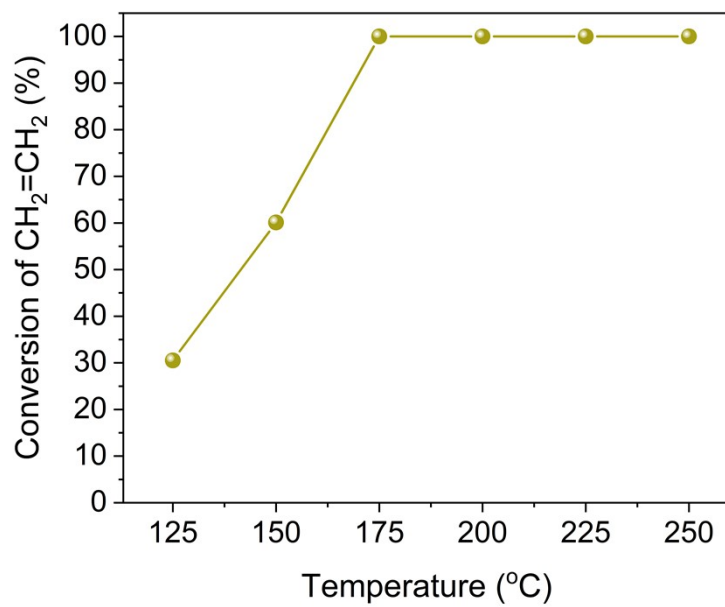

**Figure S9.** Conversion of CH<sub>2</sub>=CH<sub>2</sub> on Pt/TiO<sub>2</sub> catalyst.



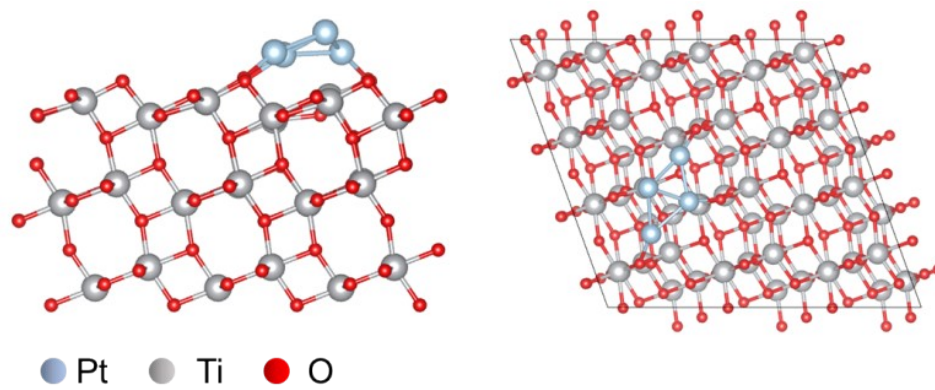

**Figure S10.** Model of Pt/TiO<sub>2</sub> catalyst calculated.

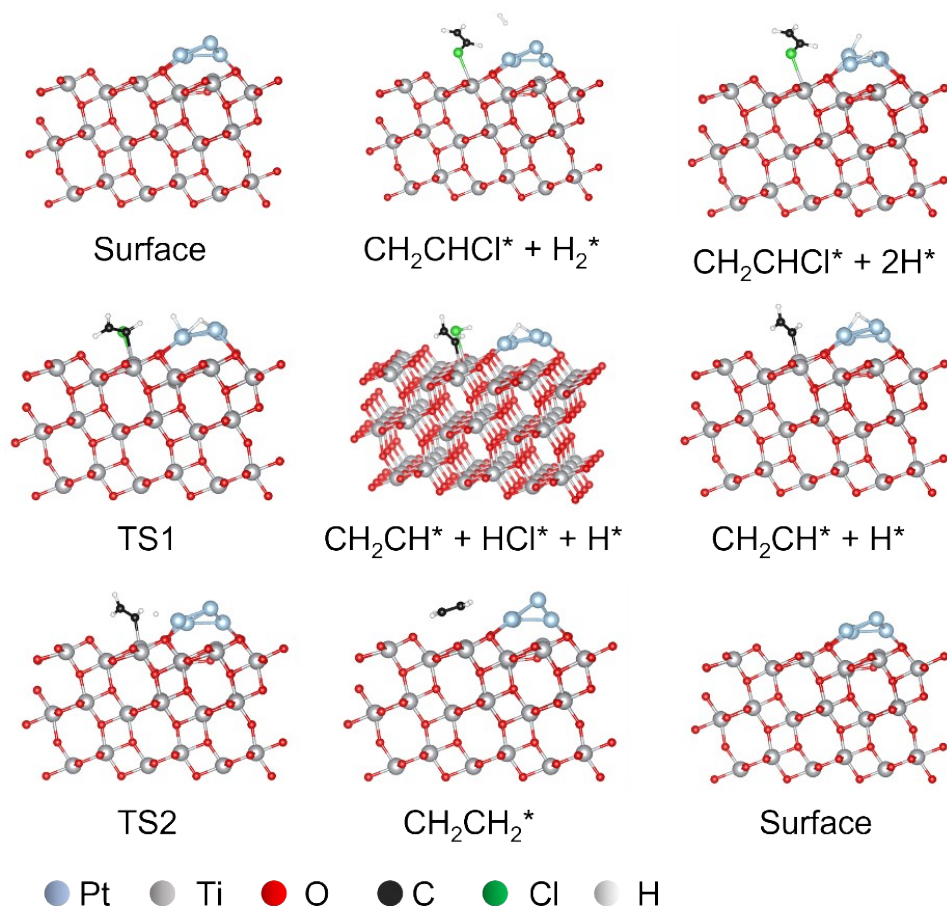

**Figure S11.** The optimized structures of intermediates and transition states in hydrogenation of  $\text{CH}_2\text{CHCl}$  on Pt/TiO<sub>2</sub> surface.

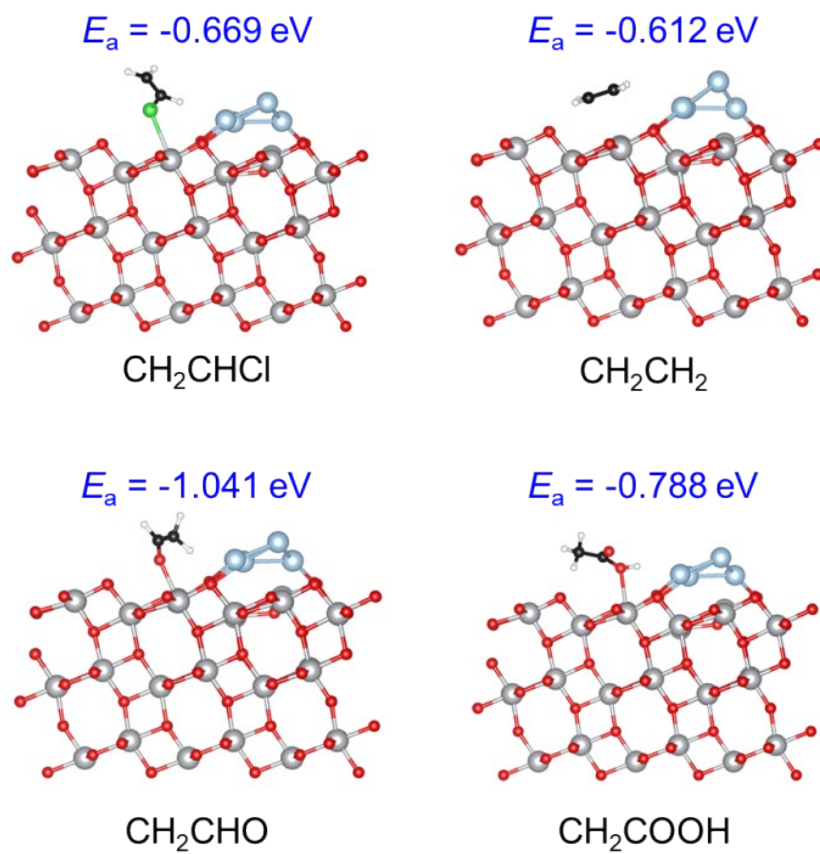

**Figure S12.** The adsorption energy of CH2CHCl, CH2CH2, CH2CHO and CH2COOH on Pt/TiO<sub>2</sub> surface.

## Discussion of potential competing pathways in oxidation of C<sub>2</sub>H<sub>4</sub>.

As shown in Fig. S8 and Fig. 4b, CH<sub>2</sub>=CH<sub>2</sub> was formed by hydrodechlorination of VC under O<sub>2</sub> on Pt/TiO<sub>2</sub> catalyst. The partial oxidation of CH<sub>2</sub>=CH<sub>2</sub> might occur in the presence of O<sub>2</sub> over the catalyst and formed ethylene oxide (C<sub>2</sub>H<sub>4</sub>O), acetaldehyde (CH<sub>3</sub>CHO), acetic acid (CH<sub>3</sub>COOH). FT-IR spectra of mixture gas from reactor outlet at 200 °C were shown in Fig. 2 and S8. As the figure showed, besides HCl, CO<sub>2</sub>, CH<sub>2</sub>CH<sub>2</sub> and CH<sub>2</sub>CHCl, no bands assigned to other products (C<sub>2</sub>H<sub>4</sub>O, CH<sub>3</sub>CHO, CH<sub>3</sub>COOH, etc.) could be found, thus CH<sub>2</sub>CH<sub>2</sub> should be completely oxidized to CO<sub>2</sub> over Pt/TiO<sub>2</sub> catalyst. In addition, catalysts should have a large influence on the oxidation of CH<sub>2</sub>CH<sub>2</sub>. On Ag-based catalyst, CH<sub>2</sub>CH<sub>2</sub> was partially oxidized to C<sub>2</sub>H<sub>4</sub>O.<sup>1</sup> However, for Pt-based catalysts, previous works indicated that CO<sub>2</sub> was easy to form by oxidation of CH<sub>2</sub>CH<sub>2</sub>.<sup>2</sup>

1. T. Pu, H. Tian, M. E. Ford, S. Rangarajan, I. E. Wachs. ACS Catal., 2019, 9, 10727-10750.

2. C. Jiang, K. Hara, A. Fukuoka. Angew. Chem. Inter. Ed., 2013, 52, 6265-6268.
